# Supplementary material for: Top 100 Most-Cited Papers in Neuropathic Pain From 2000 to 2020: A Bibliometric Study
Source: PubMed Central journal article supplement (PMC8632696; doi:10.3389/fneur.2021.765193), 2021-11-12

**Supplementary Figure 1. The analysis of keywords. Network map of keywords with the most occurrences from the top 100 most-cited papers on neuropathic pain research.**

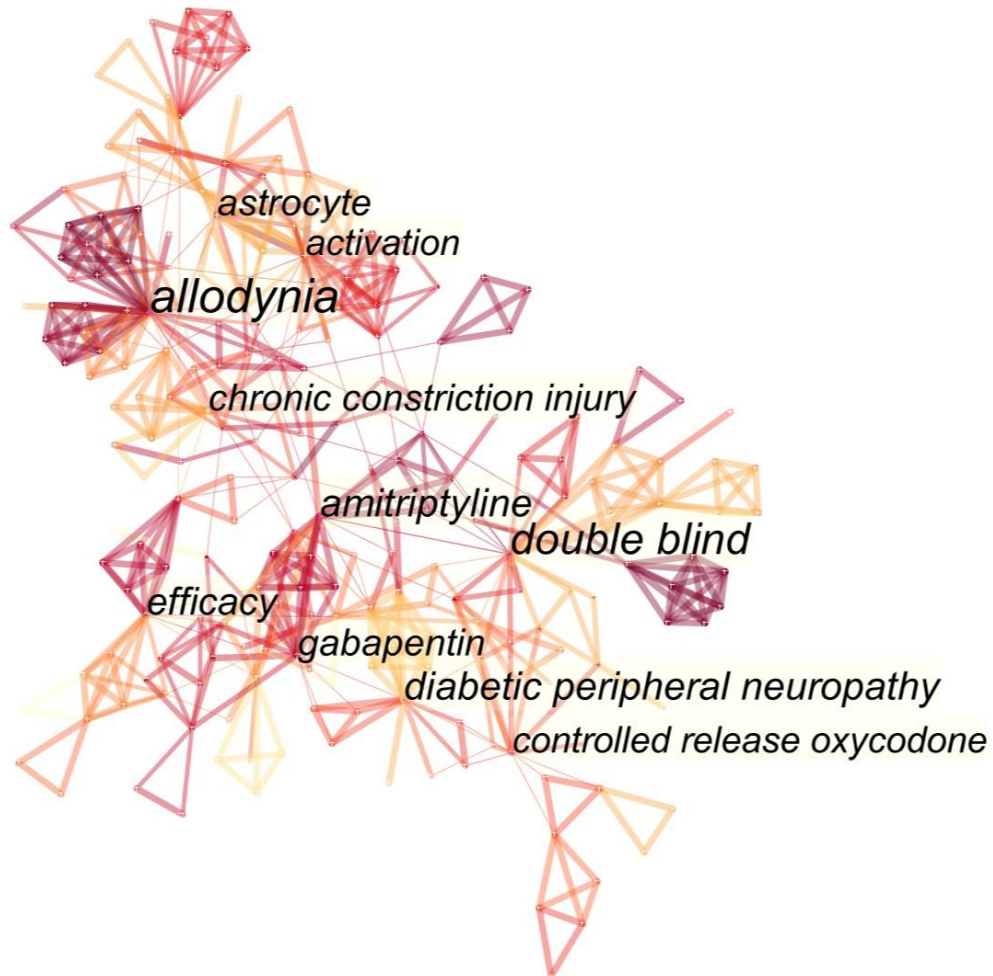

Supplement: Image_1.pdf [file Image_1.pdf]
